# Supplementary material for: Combination of poly I:C and Pam3CSK4 enhances activation of B cells in vitro and boosts antibody responses to protein vaccines in vivo
Source: PubMed Central journal article supplement (PMC5491120; doi:10.1371/journal.pone.0180073), 2017-06-29

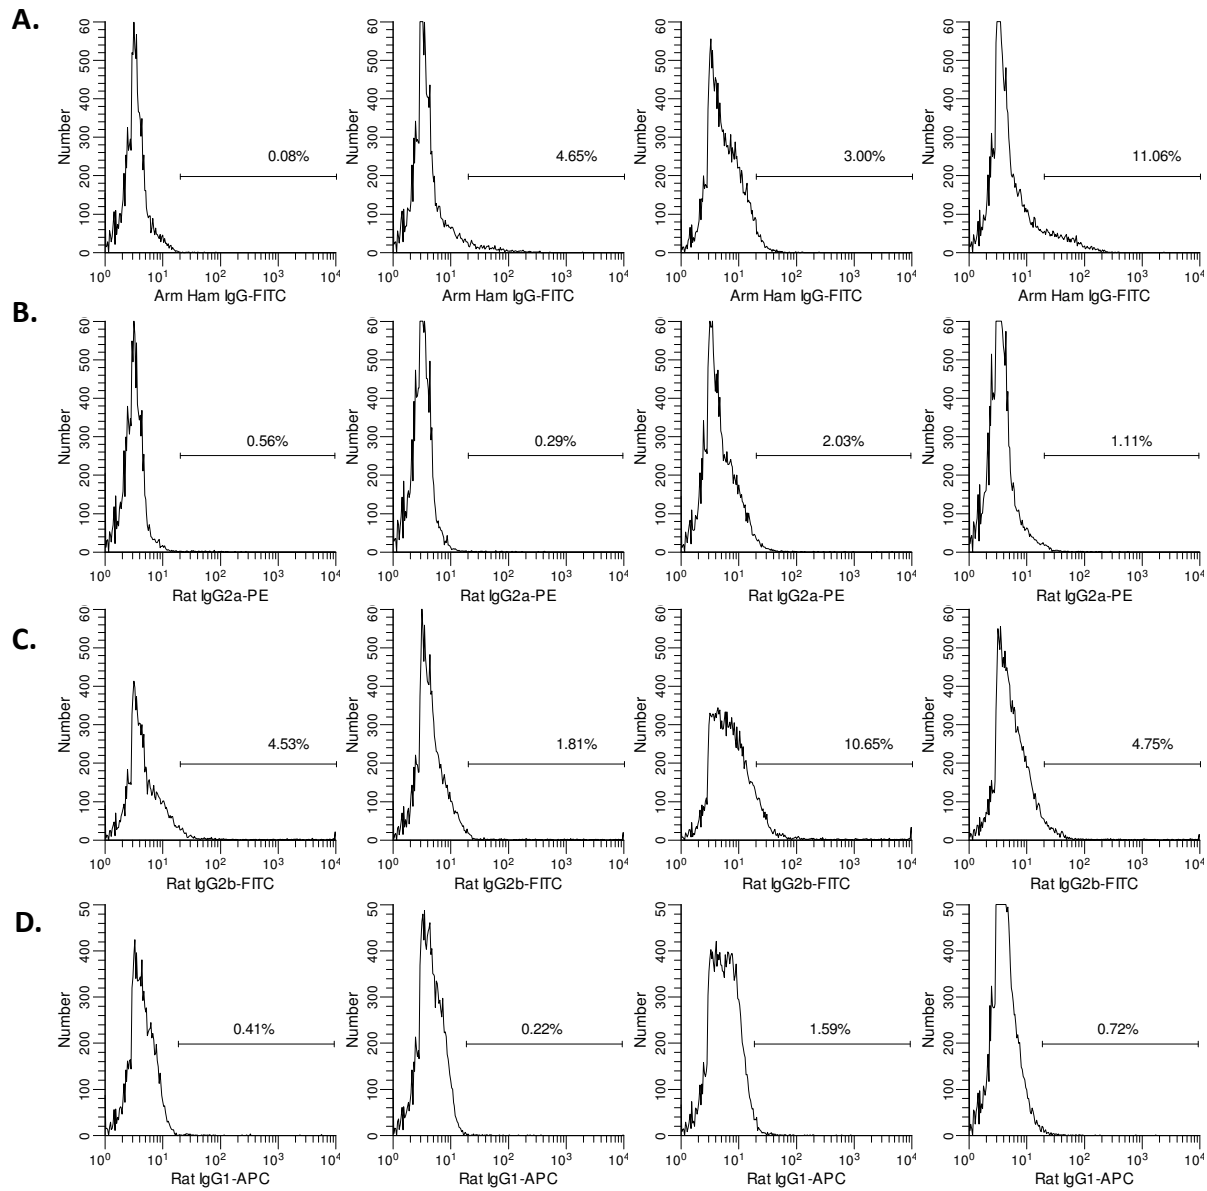

Supplement: pone.0180073.s002.pdf [file pone.0180073.s002.pdf]
